# Supplementary material for: Hypothalamic Neurochemical Changes in Long-Term Recovered Bilateral Subdiaphragmatic Vagotomized Rats
Source: Front Behav Neurosci. 2022 Jul 8;16:869526. doi: 10.3389/fnbeh.2022.869526 (PMC9304976; doi:10.3389/fnbeh.2022.869526)
Supplement: Supplementary file 1 [file Data_Sheet_1.xlsx]

## Sheet: S1
Table S1. SAMPLES USED FOR MICROARRAY AND qPCR EXPERIMENTS
Group	Vagotomy	Sham operation	Ip. LPS	Ip. NaCL	Collection date	Sample ID	Sample Name	Sample mass (g)	260/230	260/280	RIN	Array strip name	Probe array postion	Array hybrydiziation date
CNT					2013-11-18	C.1	PI 51	0.06628	missing	missing	not analyzed	qPCR only	qPCR only	qPCR only
CNT					7.03.2019	C.10	C45	0.04259	2.221	2.103	not analyzed	qPCR only	qPCR only	qPCR only
CNT					2013-11-19	C.2	WI 6	0.04751	2.25	2.18	9.9	Brain1	G01	29.03
CNT					2013-11-20	C.3	SI 36	0.04292	1.913	2.09	10	Brain7	G01	5.04
CNT					2014-01-20	C.4	PII 21	0.06626	2.206	2.077	9.6	Brain3	G01	31.03
CNT					2014-01-21	C.5	WII 6	0.04425	2.2	2.18	10	Brain8	E01	5.04
CNT					20.12.2018	C.6	C29	0.04559	2.264	2.099	not analyzed	qPCR only	qPCR only	qPCR only
CNT					15.01.2019	C.7	C34	0.03282	2.242	2.098	not analyzed	qPCR only	qPCR only	qPCR only
CNT					5.02.2019	C.8	C44	0.04264	2.244	2.093	not analyzed	qPCR only	qPCR only	qPCR only
CNT					16.02.2019	C.9	C41	0.04936	2.215	2.087	not analyzed	qPCR only	qPCR only	qPCR only
CNT					missing	C.11	D2	not analyzed	missing	missing	10	Brain10	A01	5.04
SHAM-I		+	+		2013-11-18	S.1.1	PI 111	0.04958	2.21	2.17	9.9	Brain3	E01	31.03
SHAM-I		+	+		missing	S.1.2	D58	not analyzed	2.24	2.084	10	Brain9	E01	5.04
SHAM-I		+	+		2013-11-19	S.1.3	WI 111	0.04638	2.158	2.092	9.9	Brain12	G01	7.04
SHAM-I		+	+		2013-11-19	S.1.4	WI 171	0.04933	2.16	2.17	9.9	Brain1	C01	29.03
SHAM-I		+	+		16.02.2019	S.1.5	S35	0.05699	2.213	2.097	not analyzed	qPCR only	qPCR only	qPCR only
SHAM-I		+	+		16.02.2019	S.1.6	S36	0.04241	2.231	2.101	not analyzed	qPCR only	qPCR only	qPCR only
SHAM-I		+	+		16.02.2019	S.1.7	S37	0.03912	2.043	2.096	not analyzed	qPCR only	qPCR only	qPCR only
SHAM-I		+	+		16.02.2019	S.1.8	S39	0.04936	2.199	2.095	not analyzed	qPCR only	qPCR only	qPCR only
SHAM-I		+	+		7.03.2017	S.1.9	S47	0.04229	2.221	2.092	not analyzed	qPCR only	qPCR only	qPCR only
SHAM-III		+		+	2013-11-18	S.3.1	PI 81	0.05408	missing	missing	not analyzed	qPCR only	qPCR only	qPCR only
SHAM-III		+		+	missing	S.3.2	D23	not analyzed	2.1	2.067	9.8	Brain4	C01	31.03
SHAM-III		+		+	missing	S.3.3	D9	not analyzed	2.017	2.083	10	Brain13	A01	7.04
SHAM-III		+		+	missing	S.3.4	D30	not analyzed	2.15	2.086	10	Brain0	C01	10.03
SHAM-III		+		+	2014-01-20	S.3.5	PII 111	0.05938	2.143	2.088	9.9	Brain2	C01	29.03
SHAM-III		+		+	20.12.2018	S.3.6	S17	0.05658	2.008	2.103	not analyzed	qPCR only	qPCR only	qPCR only
SHAM-III		+		+	20.12.2018	S.3.7	S18	0.05759	2.235	2.107	not analyzed	qPCR only	qPCR only	qPCR only
SHAM-III		+		+	20.12.2018	S.3.8	S19	0.04257	2.22	2.091	not analyzed	qPCR only	qPCR only	qPCR only
SHAM-III		+		+	20.12.2018	S.3.9	S20	0.05277	2.197	2.088	not analyzed	qPCR only	qPCR only	qPCR only
VGAX-I	+		+		2013-11-20	V.1.1	SI 246	0.03514	missing	missing	not analyzed	qPCR only	qPCR only	qPCR only
VGAX-I	+		+		16.02.2019	V.1.10	V33	0.06447	2.124	2.092	not analyzed	qPCR only	qPCR only	qPCR only
VGAX-I	+		+		2014-01-20	V.1.2	PII 186	0.04375	2.156	2.093	9.3	Brain0	G01	10.03
VGAX-I	+		+		missing	V.1.3	D65	not analyzed	2.24	2.08	10	Brain2	A01	29.03
VGAX-I	+		+		2014-01-21	V.1.4	WII 111	0.04895	2.201	2.086	9.5	Brain3	A01	31.03
VGAX-I	+		+		2014-01-21	V.1.5	WII 216	0.03353	2.21	2.19	10	Brain9	A01	5.04
VGAX-I	+		+		2014-01-22	V.1.6	SII 141	0.03728	2.242	2.095	9.6	Brain8	G01	5.04
VGAX-I	+		+		16.02.2019	V.1.7	V30	0.04864	2.03	2.085	not analyzed	qPCR only	qPCR only	qPCR only
VGAX-I	+		+		16.02.2019	V.1.8	V31	0.05829	2.165	2.079	not analyzed	qPCR only	qPCR only	qPCR only
VGAX-I	+		+		16.02.2019	V.1.9	V32	0.05692	2.208	2.098	not analyzed	qPCR only	qPCR only	qPCR only
VGAX-III	+			+	2013-11-18	V.3.1	PI 231	0.05295	missing	missing	not analyzed	qPCR only	qPCR only	qPCR only
VGAX-III	+			+	2013-11-18	V.3.2	PI 261	0.06583	2.23	2.19	10	Brain11_2	G01	12.04
VGAX-III	+			+	2013-11-19	V.3.3	WI 261	0.06342	2.07	2.088	9.6	Brain4	G01	31.03
VGAX-III	+			+	2013-11-20	V.3.4	SI 231	0.05657	2.22	2.2	9.9	Brain12	E01	7.04
VGAX-III	+			+	20.12.2018	V.3.5	V3	0.06052	2.231	2.092	not analyzed	qPCR only	qPCR only	qPCR only
VGAX-III	+			+	20.12.2018	V.3.6	V8	0.07669	2.116	2.097	not analyzed	qPCR only	qPCR only	qPCR only
VGAX-III	+			+	20.12.2018	V.3.7	V9	0.05298	2.24	2.097	not analyzed	qPCR only	qPCR only	qPCR only
VGAX-III	+			+	20.12.2018	V.3.8	V10	0.06038	2.232	2.098	not analyzed	qPCR only	qPCR only	qPCR only

## Sheet: S2
Table S2. PRIMERS
Gene Symbol	RefSeq ID	Variants (RefSeq)	Direction	Sequence (5'->3')	Source	Exonic location of primer	SNPs (GMAF >= 0.01	Amplicon lenght	Hairpin maximal energy (ΔG (kcal. mole-1))	Hairpin maximal energy in last 5 nucleotides of 3' end?	Primer dimer maximal energy (ΔG (kcal/mole))	Primer F-R dimer maximal energy (kcal/mole)	Anealing temp. (oC)	Primer concentration in reaction (uM)	used cDNA (ul)	Dilution curve slope	PCR efficiency (%)	r2 of dilution curve	Mean highest dilution of dilution curve Cq	Mean NTC Cq
Gabrg1	NM_080586.1	XM_017599055.1	Forward	ACAACCCTCAGTACAATCGC	Designed in Primer-BLAST (https://www.ncbi.nlm.nih.gov/tools/primer-blast) and Oligoanalyzer (https://eu.idtdna.com/calc/analyzer/)	8	no data	198	0.42	no	-3.65	-6.14	58	0.5	3	-3.09	110.17	0.998	21.95	25.43
			Reverse	TGGGGATACCGAAGTTTTGC		9	no data		-1.63	no	-3.61
Gria1	NM_031608.1	none	Forward	GCAGACGGAAATTGCTTATGGG	Designed in Primer-BLAST (https://www.ncbi.nlm.nih.gov/tools/primer-blast) and Oligoanalyzer (https://eu.idtdna.com/calc/analyzer/)	12	no data	138	-0.59	no	-5,36	-8,26	58	0.5	3	-3.39	97.19	0.997	22.65	28.18
			Reverse	TCTGTGGTCCGAACAAACACG		13	no data		-0.27	yes	-3,61
Oxt	NM_012996.3	none	Forward	TGCCCCAGTCTTGCTTGC	Designed in Primer-BLAST (https://www.ncbi.nlm.nih.gov/tools/primer-blast) and Oligoanalyzer (https://eu.idtdna.com/calc/analyzer/)	1	no data	244	0.01	no	-3,14	-11,23	58	0.5	3	-4.02	77.27	0.996	20.88	21.8
			Reverse	GCGAGGGCAGGTAGTTCTCC		2	no data		-0.67	no	-3,61
Vim	NM_031140.1	none	Forward	ACAAGTCCAAGTTTGCTGACC	Designed in Primer-BLAST (https://www.ncbi.nlm.nih.gov/tools/primer-blast) and Oligoanalyzer (https://eu.idtdna.com/calc/analyzer/)	4/5	no data	176	-0.02	yes	-3.9	-5.09	65	0.5	3	-3.32	99.97	0.999	24.07	26.24
			Reverse	CTCTTCCATTTCACGCATCTGG		6	no data		0.14	yes	-5,02
Cxcl14	NM_001013137.2	none	Forward	GGGTCCAAGTGTAAGTGTTCC	Designed in Primer-BLAST (https://www.ncbi.nlm.nih.gov/tools/primer-blast) and Oligoanalyzer (https://eu.idtdna.com/calc/analyzer/)	2	no data	203	1.24	yes	-3.07	-4,41	57	0.5	3	-3.65	87.84	0.999	26.23	30.28
			Reverse	GCGTTGTACCATTTGATGAAGC		3	no data		-0.47	no	-3.65
Rab1b	NM_001109979.2	XM_002727597.4, XM_017604276.1, XM_008760197.2	Forward	ACTACAGATTTGGGACACAGC	Designed in Primer-BLAST (https://www.ncbi.nlm.nih.gov/tools/primer-blast) and Oligoanalyzer (https://eu.idtdna.com/calc/analyzer/)	4	no data	168	-0.1	no	-3.14	-3.9	65	0.5	3	-3.32	100.06	0.999	24.77	29.31
			Reverse	ACATTCTCACTGGCGTAGCG		2	no data		-1.36	yes	-3,61
Actn2	NM_001170325.1	none	Forward	GATTTCAGAGCCTGCCTCATTTCC		19	no data	103	-1.33	no	-3.55	-4,67	63	0.25	3	-3.84	81.88	0.997	30.19	>35
			Reverse	AGGTGACCGTGCCTTGTCC		20	no data		-0.1	yes	-4.67
Hmbs	NM_013168.2	XM_008766148.2, XM_006242896.2, XM_008766149.2	Forward	TCCTGGCTTTACCATTGGAG	Reference Genes for Normalization:A Study of Rat Brain Tissue	6	no data	176	-1.11	no	-5.02	-9.69	57	0.5	3	-3.44	95.05	0.999	28.6	>35
			Reverse	TGAATTCCAGGTGAGGGAAC		8	no data		-1.07	yes	-8.51
Hprt	NM_012583.2	XM_008773659.2	Forward	CTCATGGACTGATTATGGACAGGAC	Designed in Primer-BLAST (https://www.ncbi.nlm.nih.gov/tools/primer-blast) and Oligoanalyzer (https://eu.idtdna.com/calc/analyzer/)	2	no data	123	-1.07	yes	-5.38	-5.13	57	0.5	5	-3.07	111.39	0.996	25.9	31.6
			Reverse	GCAGGTCAGCAAAGAACTTATAGCC		3	no data		-0.28	no	-3.54
Ywhaz	NM_013011.3	XM_006241529.3	Forward	GATGAAGCCATTGCTGAACTTG	Designed in Primer-BLAST (https://www.ncbi.nlm.nih.gov/tools/primer-blast) and Oligoanalyzer (https://eu.idtdna.com/calc/analyzer/)	5	no data	117	-1.37	no	-4.74	-5.02	58	0.5	3	-3.22	104.37	0.999	17.3	26.6
			Reverse	GTCTCCTTGGGTATCCGATGTC		6	no data		0.09	no	-3.61
Tbp	NM_001004198.1	XM_008758748.1, XM_008758747.2, XM_006227980.3	Forward	CCTATCACTCCTGCCACACC	Designed in Primer-BLAST (https://www.ncbi.nlm.nih.gov/tools/primer-blast) and Oligoanalyzer (https://eu.idtdna.com/calc/analyzer/)	3	no data	210	1.15	no	-3.14	-3.55	58	0.5	3	-3.18	105.93	0.998	26.2	29.8
			Reverse	CCCAGAACTGAAGATCAACGC		5	no data		-0.53	no	-4.62
Gadph			Forward										58	0.5	3	-3.78	83.85	0.997	19.2	29.8
			Reverse

## Sheet: S3
Table S3. RESULTS OF ANALYSIS OF REFERENECE GENES STABILITY
Gene name	Stability value			Best gene	HMBS
GADPH	0.110239			Stability value	0.0513353
HMBS	0.0513353
HPRT1	0.0583416			Best combination of two genes	HMBS and HPRT1
TBP	0.200893			Stability value for best combination of two genes	0.0422799
YHWAZ	0.101763
Intragroup variation
Group identifier	1	2	3	4	5
GADPH	0.0302529	0.141243	0.00283137	0.157171	0.0543337
HMBS	0.0437308	0.00163975	0.0323304	0.00908941	0.00241946
HPRT1	0.00483099	0.00570904	0.010296	0.103093	0.00716825
TBP	1.56009	0.0323046	0.00179113	0.0698605	0.260758
YHWAZ	0.0294081	0.0502015	0.00250105	0.0481055	0.223598
Intergroup variation
Group identifier	1	2	3	4	5
GADPH	0.0345445	0.0655954	-0.0699966	-0.0734102	0.0432669
HMBS	0.013714	0.0480473	0.0106089	-0.071744	-0.000626228
HPRT1	0.0169968	0.0629204	-0.151289	0.102335	-0.0309627
TBP	-0.0800439	-0.0394568	0.0754246	-0.144491	0.188567
YHWAZ	0.0926099	-0.065057	0.110929	0.104514	-0.242996

## Sheet: S4
Table S4. qPCR RESULTS
Gene	Comparison	qPCR p-val	qPCR adj p-val	microarray p-val (non-adj)
Actn2	C_vs_V+LPS	0.150794	0.428571	0.0111894
Actn2	S+LPS_vs_V+LPS	0.690476	0.690476	0.027865
Actn2	V+LPS_vs_V+NaCl	0.285714	0.428571	0.00721127
Cxcl14	S+NaCl_vs_V+NaCl	0.342857	0.342857	0.0129545
Cxcl14	V+LPS_vs_V+NaCl	0.190476	0.342857	0.0102843
Gabrg1	C_vs_V+LPS	0.547619	0.690476	0.00273161
Gabrg1	S+LPS_vs_V+LPS	0.690476	0.690476	0.0421817
Gria1	C_vs_V+LPS	0.547619	1	0.0142306
Gria1	S+LPS_vs_V+LPS	1	1	0.0373414
Gria1	V+LPS_vs_V+NaCl	0.904762	1	0.0279007
Oxt	C_vs_V+LPS	1	1	0.013446
Oxt	S+LPS_vs_V+LPS	1	1	0.0247364
Oxt	V+LPS_vs_V+NaCl	1	1	0.028922
Rab1b	C_vs_V+NaCl	0.555556	0.833333	0.0136064
Rab1b	S+NaCl_vs_V+NaCl	0.885714	0.885714	0.000349452
Rab1b	V+LPS_vs_V+NaCl	0.412698	0.833333	0.026743
Vim	C_vs_V+NaCl	0.730159	0.885714	0.0265986
Vim	S+NaCl_vs_V+NaCl	0.885714	0.885714	0.0104443
Vim	V+LPS_vs_V+NaCl	0.412698	0.885714	0.0192335

## Sheet: S5
Table S5 HPLC and TNF-α test results
Variable	Box-Cox transformation formula	ANOVA result for data after transformation	Bonferroni post-hoc results
			SH NaCl v SH LPS	SH NaCl v VG NaCl	SH NaCl v VG LPS	SH LPS v VG NaCl	SH LPS v VG LPS	VG NaCl v VG LPS
TNF-a	((v9^(-0.568672))-1)/(-0.568672)	F(3,34)=28.191, p<0.001	<0.001	1	<0.001	<0.001	1	<0.001
TRP	((v7^(1.107547))-1)/(1.107547)	F(3,21)=18.292, p<0.001	0.077	<0.001	<0.001	0.378	0.001	0.169
GABA	((v6^(0.623869))-1)/(0.623869)	F(3,21)=18.020, p<0.001	0.604	0.041	<0.001	1	<0.001	0.006
GLY	((v4^(-0.308854))-1)/(-0.308854)	F(3,21)=20.72, p<0.001	<0.001	<0.001	<0.001	1	0.619	1
TYR	((v5^(0.219890))-1)/(0.219890)	F(3,21)=10.419, p<0.001	0.024	0.003	<0.001	1	0.262	1
GLU	((v3^(0.181796))-1)/(0.181796)	F(3,21)=8.019, p<0.001	0.025	0.024	<0.001	1	0.84	0.886
ASP	((v2^(0.249041))-1(0.249041)	F(3,21)=15.473, p<0.001	1	0.015	<0.001	0.133	<0.001	0.135
